# Supplementary material for: The palladacycle complex AJ-5 induces apoptotic cell death while reducing autophagic flux in rhabdomyosarcoma cells
Source: PubMed Central journal article supplement (PMC6349869; doi:10.1038/s41420-019-0139-9), 2019-01-28

**A**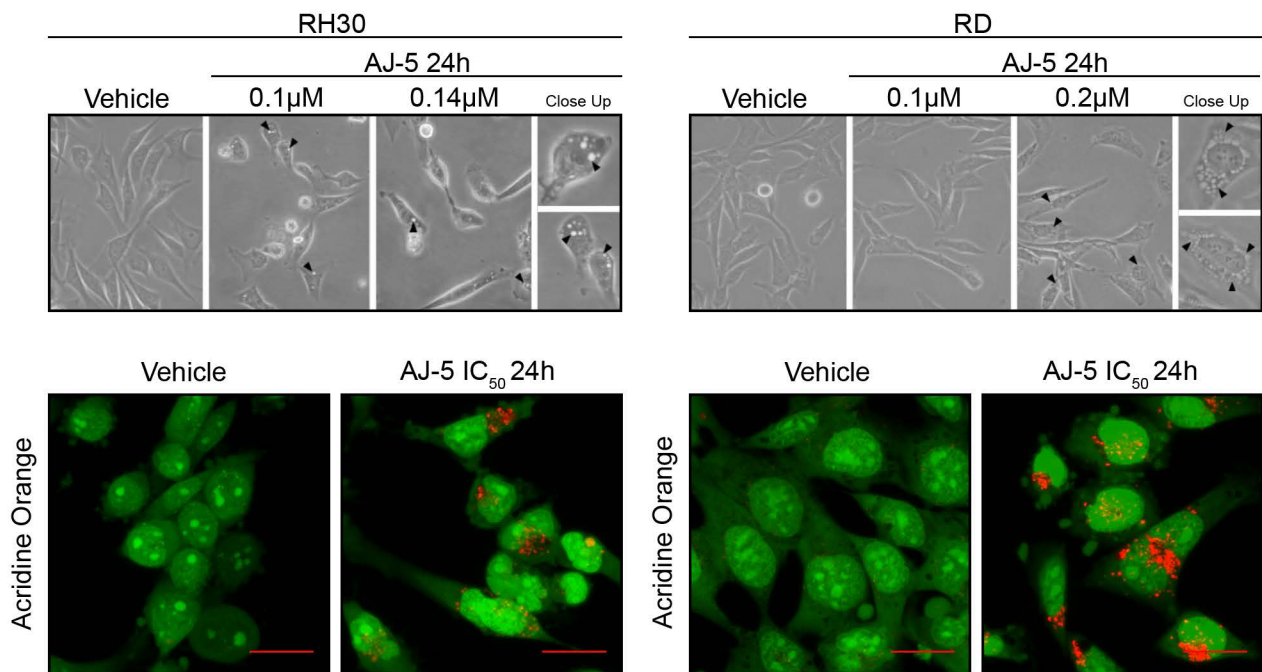**B**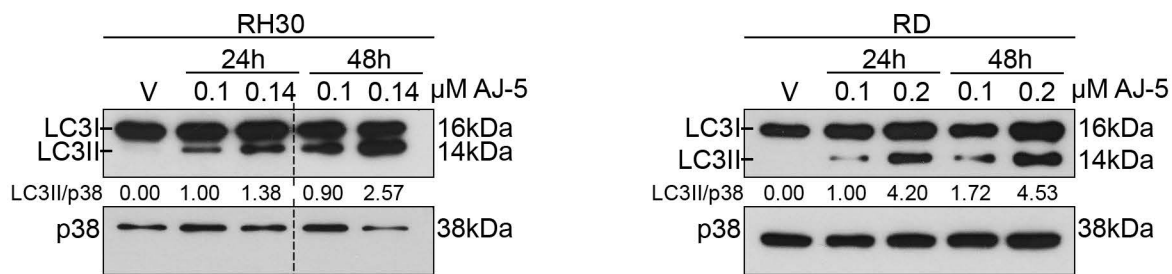**C**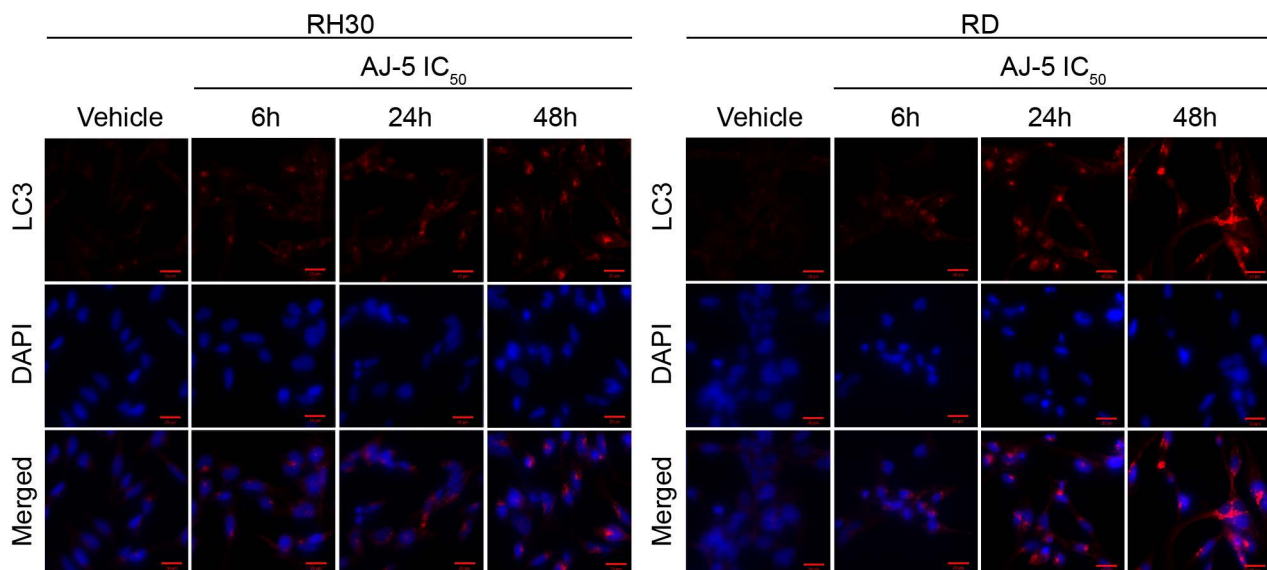

Supplement: 41420_2019_139_MOESM3_ESM.pdf [file 41420_2019_139_MOESM3_ESM.pdf]
