# Supplementary material for: The palladacycle complex AJ-5 induces apoptotic cell death while reducing autophagic flux in rhabdomyosarcoma cells
Source: PubMed Central journal article supplement (PMC6349869; doi:10.1038/s41420-019-0139-9), 2019-01-28

**A**

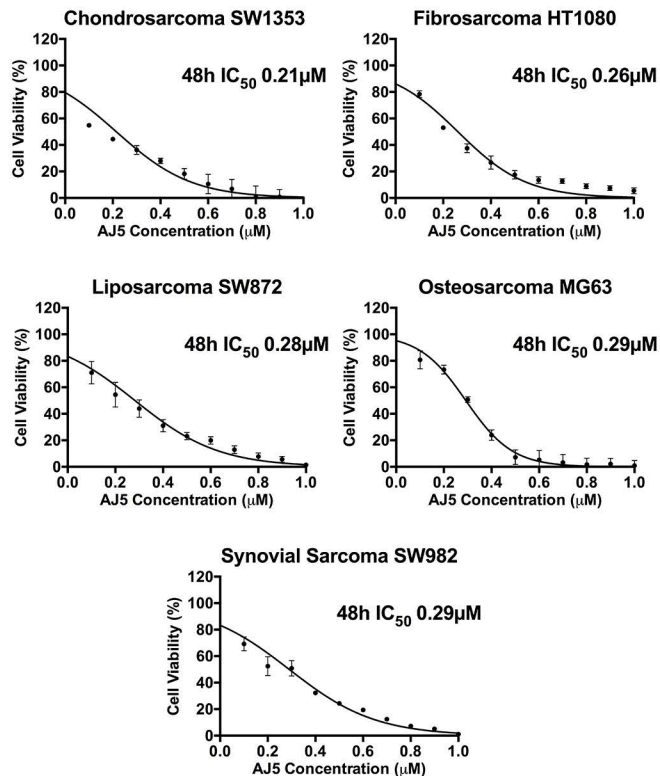

**B**

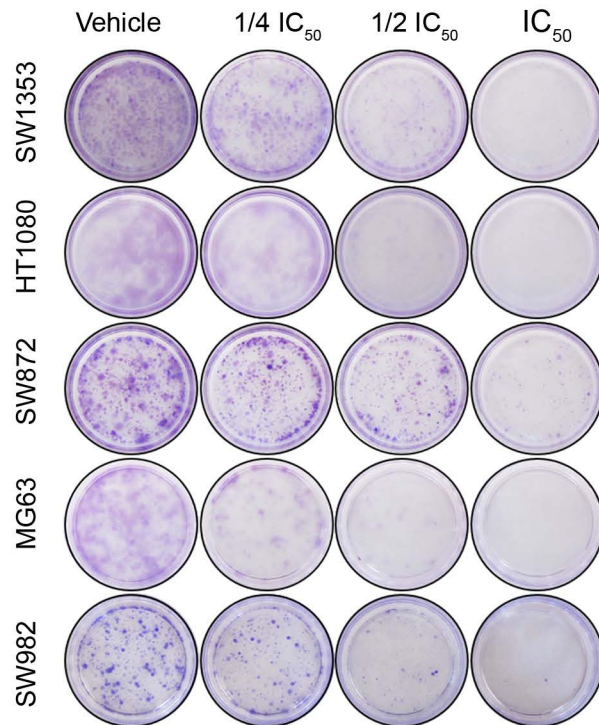

**C**

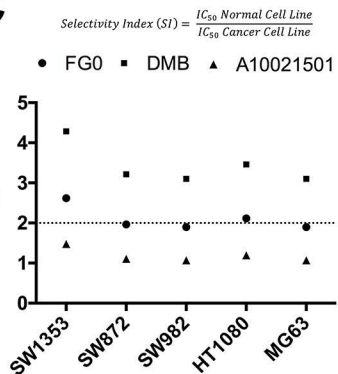

SI Values

|        | FG0  | DMB  | A10021501 |
|--------|------|------|-----------|
| SW1353 | 2.62 | 4.29 | 1.48      |
| SW872  | 1.96 | 3.21 | 1.11      |
| SW982  | 1.90 | 3.10 | 1.07      |
| HT1080 | 2.12 | 3.46 | 1.19      |
| MG63   | 1.90 | 3.10 | 1.07      |

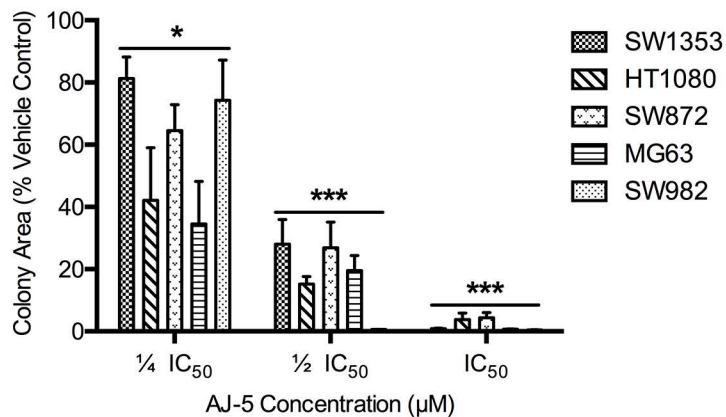

Supplement: 41420_2019_139_MOESM4_ESM.pdf [file 41420_2019_139_MOESM4_ESM.pdf]
